# Supplementary material for: BRCA1 founder mutations and beyond in the Polish population: A single-institution BRCA1/2 next-generation sequencing study
Source: PLoS One. 2018 Jul 24;13(7):e0201086. doi: 10.1371/journal.pone.0201086 (PMC6057642; doi:10.1371/journal.pone.0201086)
Supplement: S5 Table — (XLSX) [file pone.0201086.s012.xlsx]

## Sheet: S5 Table Benign
Gene	cDNA (a)	predicted protein	EKSON	Type of mutation (b)	Pathogenicity:	BIC	ClinVar	Histopatholgy	Age	Probant medical history	Famili medical history	Category
BRCA2	c.7544C>T	p.T2515I	15	M	Pending (BIC), Benign (ClinVar)	T2515I	Yes	NA	NA	Healthy	3xBC	HBCss
BRCA2	c.9976A>T	p.K3326*	27	N	Pending (BIC), Benign (ClinVar)	K3326X	Yes	TNBC	77	2xBC	None
BRCA2	c.9976A>T	p.K3326*	27	N	Pending (BIC) Benign (ClinVar)	K3326X	Yes	TNBC	58	BC	None
BRCA2	c.10234A>G	p. I3412V	27	M	Not pathogenic (BIC), Benign (ClinVar)	I3412V	Yes	Luminal B (HER2-)	62	BC	3x BC	HBC ss
(a )sequence variants were described according to BRCA1 mRNA sequence MN_007294.3 and BRCA2 mRNA sequence NM_000059.3
(b) F – frameshift variant; N – nonsense variant; M – missense variant; S – splicing variant.
	BC	breat cancer
